# Supplementary material for: Intraneuronal β-Amyloid Accumulation: Aging HIV-1 Human and HIV-1 Transgenic Rat Brain
Source: MDPI journal article supplement (doi:10.3390/v14061268), 2022-06-10
Supplement: s1 [file s1]

**Table S1. Manhattan HIV Brain Bank participants:**

| PID   | age | sex | race  | HIV risk | Last VL | Last CD4 |
|-------|-----|-----|-------|----------|---------|----------|
| 10288 | 67  | f   | b     | sex      | <20     | 598      |
| 10214 | 55  | f   | h     | ivdu     | und     | 141      |
| 10321 | 74  | m   | w     | sex      | 202     | 429      |
| 10272 | 61  | m   | b     | sex      | <20     | 374      |
| 10229 | 59  | f   | b     | sex      | <20     | 747      |
| 10163 | 68  | m   | b/ind | ivdu     | und     | 527      |
